# Supplementary material for: Clinical utility of comprehensive genomic profiling test for colorectal cancer: A single institution prospective observational study
Source: Research Square preprint supplement (doi:10.21203/rs.3.rs-7112192/v1), 2025-07-18
Supplement: Supplementary file 1 [file 85f58a32c1049e609c6b5421.xlsx]

## Sheet: Table 1
Table 1. Characteristics of the patients
		Value (N=100)
Age
	Median (range)	67 (28-79)
Sex
	Male	53
	Female	47
ECOG performance status
	0	82
	1	18
Tumor location
	right	33
	left	67
Differentiation
	Well differentiated	40
	Moderately differentiated	50
	Poorly differentiated	3
	Mucinous	7
Metastasis
	Lung	55
	Liver	57
	Lymph node	26
	Peritoneum	32
	bone	9
	other	11
Previous chemotherapy
	1	6
	2	25
	3	17
	4	24
	5	28

## Sheet: Table 2
Table 2. Results of the CGP-based therapy
Patient No	Age	Tumor location	CDx	Genetic alteration	CGP-based therapy	Treatment	Best response
9	70	right	F1	TMB-high	immune checkpoint inhibitor	patient-proposed healthcare service	SD
21	69	right	F1	HER2 amplification	HER2 inhibitor	clinical trial	cannot reported
23	56	left	F1	HER2 amplification	HER2 inhibitors	public health insurance	PD
36	36	left	NCC	MSI-high, TMB-high, BRAF V600E	immune checkpoint inhibitors	public health insurance	CR
40	64	right	NCC	MSI-high, TMB-high	immune checkpoint inhibitors	public health insurance	PR
56	58	left	F1L	TMB-high	immune checkpoint inhibitor	clinical trial	cannot reported
85	66	left	NCC	TMB-high	immune checkpoint inhibitor	public health insurance	PD
88	67	left	TOP	TMB-high	immune checkpoint inhibitor	public health insurance	PD
93	71	right	TOP	BRAF V600E	BRAF inihibitor + EGFR inhibitor + MEK inhibitor	public health insurance	PR
CGP, comprehensive genomic profiling; CDx, companion diagnostics; F1, FoundationOne; NCC, OncoGuide NCC Oncopanel; F1L, FoundationOne Liquid; TOP, GenMineTOP

## Sheet: Table 3
Table 3. Univariate analysis of OS after EP with clinical feature
		HR (95% CI)	P-value
Age	<64	1
	65 	0.85 (0.53-1.35)	0.49
Sex	Female	1
	Male	1.03 (0.82-1.30)	0.81
ECOG performance status
	0	1
	1	1.29 (0.73-2.28)	0.39
Tumor location
	right	1
	left	0.84 (0.66-1.07)	0.17
Differentiation
	Well differentiated	0.59 (0.35-0.98)	0.04
	Moderately differentiated	1
	Poorly differentiated	0.23 (0.03-1.77)	0.16
	Mucinous	2.68 (1.16-6.20)	0.02
Metastasis
	Lung	1.04 (0.65-1.66)	0.87
	Liver	1.41 (0.88-2.26)	0.15
	Lymph node	1.32 (0.79-2.21)	0.29
	Peritoneum	0.83 (0.50-1.37)	0.45
	bone	2.51 (1.23-5.13)	0.01
	other	0.95 (0.47-1.92)	0.89
